# Supplementary material for: Temporal lobe epilepsy with GAD antibodies: neurons killed by T cells not by complement membrane attack complex
Source: PubMed Central journal article supplement (PMC10115353; doi:10.1093/brain/awac404), 2022-10-31
Supplement: awac404_supplementary_data.pdf [file awac404_supplementary_data.pdf]

## Supplementary Figure 1

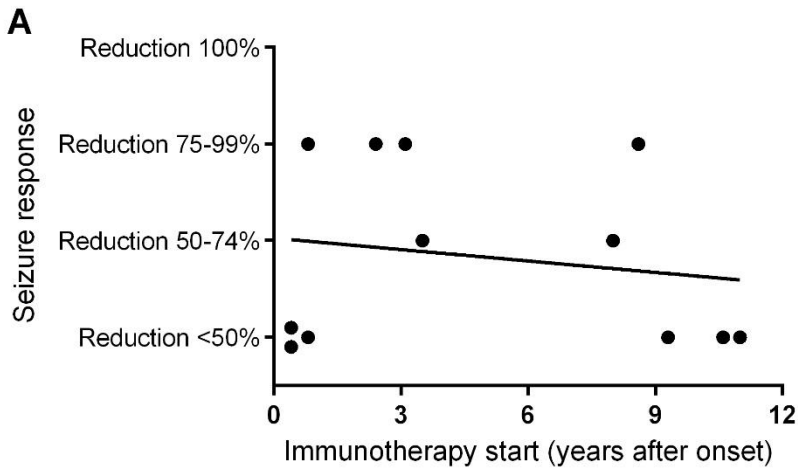

**B**

| Start of immunotherapy | Responders (at least 50% reduction) | Non-responders |
|------------------------|-------------------------------------|----------------|
| <2.5 years             | 2                                   | 3              |
| >2.5 years             | 3                                   | 4              |

### Supplementary Figure 1: Time to start of immunotherapy vs seizure response.

Neither the regression line (A) nor the contingency table (B) give significant results arguing for a benefit of earlier immunotherapy in this cohort (two-tailed Spearman nonparametric correlation:  $P=0.83$ ; contingency table, Fisher exact test:  $P=1.0$ ). For a definition of the outcome categories 1-4, see the section "Patients and Methods". For (B), other cut-offs between "early" and "late" therapy also did not give a significant difference.

[Epilepsy with GAD antibodies](#): Neurons killed by T cells, not antibody-mediated membrane attack complex

## Supplementary Figure 2

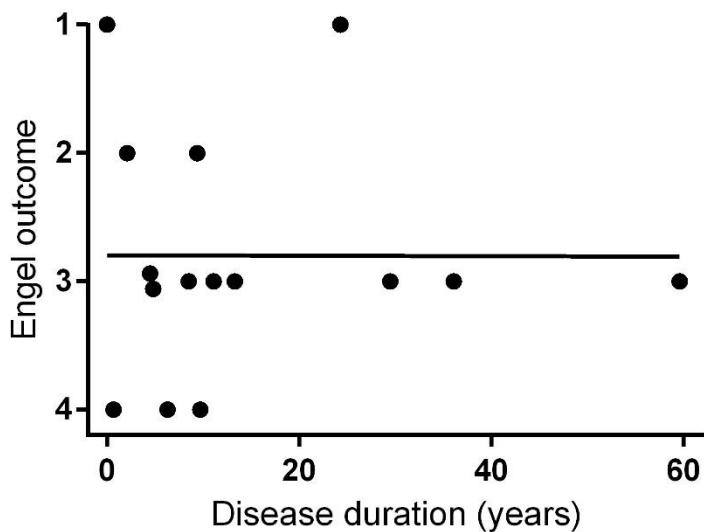

### Supplementary Figure 2. Disease duration at surgery vs Engel outcome.

Two-tailed Spearman nonparametric correlation:  $P=0.9$ .

### Supplementary Figure 3

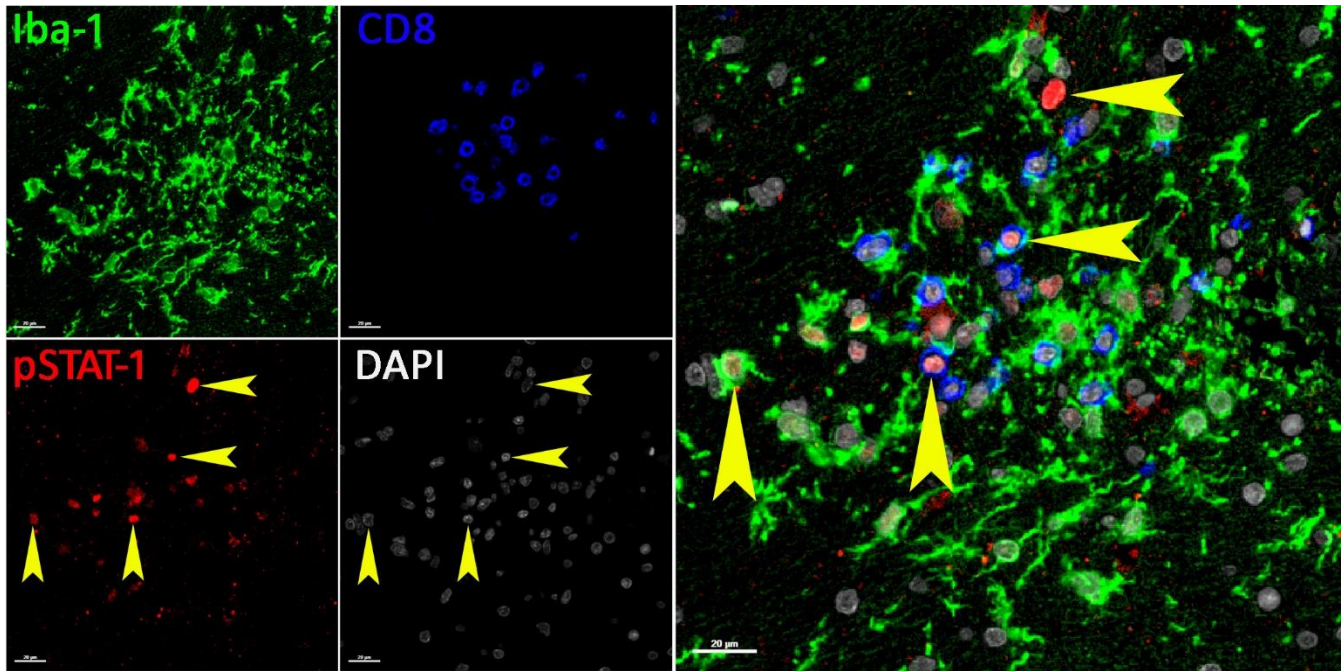

#### Supplementary Figure 3: pSTAT-1 in microglial nodules in GAD-TLE.

Triple staining for Iba-1, CD8 and pSTAT-1 shows nuclear upregulation of pSTAT-1 in a microglial nodule consisting of Iba-1<sup>+</sup> microglial cells and CD8<sup>+</sup> CTLs. pSTAT-1 can be found in microglia, T cells but also in other glial cells. Yellow arrowheads point at nuclear presence of pSTAT-1. The most upper arrowhead points at an Iba-1 and CD8 negative cell, that (indicated by the size of the nucleus) probably is an astrocyte.

**Supplementary Table 1**

| <b>Antibody</b> | <b>Species</b> | <b>Target</b>                                                                                                   | <b>Concentration</b>                              | <b>Secondary AB/Fluorophore</b>                                                            | <b>Pretreatment</b> | <b>Company</b>                                           |
|-----------------|----------------|-----------------------------------------------------------------------------------------------------------------|---------------------------------------------------|--------------------------------------------------------------------------------------------|---------------------|----------------------------------------------------------|
| <b>CD3</b>      | Rabbit         | epsilon chain of human CD3                                                                                      | 1:500 +CSA enhancement<br>1.500 (Opal)            | bi- $\alpha$ -rabbit <sup>1</sup><br>Opal <sup>3</sup>                                     | EDTA pH9<br>AR9     | Neomarkers<br>#RM9107-S                                  |
| <b>CD8</b>      | Mouse          | cytoplasmic domain of human CD8 $\alpha$                                                                        | 1:500 +CSA enhancement<br>1.500 (Opal)            | bi- $\alpha$ -mouse <sup>2</sup><br>Opal <sup>3</sup><br>Cy5- $\alpha$ -mouse <sup>4</sup> | EDTA pH9<br>AR9     | Dako<br>#M7103                                           |
| <b>CD20</b>     | Mouse          | human tonsil B-cells                                                                                            | 1:100                                             | bi- $\alpha$ -mouse <sup>2</sup>                                                           | EDTA pH9            | Thermoscientific<br>#MS-340                              |
| <b>CD138</b>    | Mouse          | recognises a heparan sulfate rich membrane glycoprotein known as Syndecan-1 (CD138)                             | 1:500 +CSA enhancement                            | bi- $\alpha$ -mouse <sup>2</sup>                                                           | EDTA pH9            | Serotec<br>#MCA681H                                      |
| <b>GrB</b>      | Mouse          | Recombinant protein encoding the n-terminus of the mature granzyme B                                            | 1:1000 +CSA enhancement<br>1:50<br>1:100 for Opal | bi- $\alpha$ -mouse <sup>2</sup><br>Opal <sup>3</sup>                                      | EDTA pH9<br>AR9     | Neomarkers<br>#MS-1157-S1                                |
| <b>NeuN</b>     | Mouse          | Vertebrate neuron-specific nuclear protein                                                                      | 1:2500 +CSA enhancement<br>1:1000                 | bi- $\alpha$ -mouse <sup>2</sup><br>Opal <sup>3</sup>                                      | Citrate             | Chemicon<br>#MAB377                                      |
| <b>CD103</b>    | Rabbit         | human integrin alpha E                                                                                          | 1:5000                                            | Opal <sup>3</sup>                                                                          | AR9                 | Abcam<br>#ab129202                                       |
| <b>PD1</b>      | Rabbit         | human PD1                                                                                                       | 1:150                                             | Opal <sup>3</sup>                                                                          | AR9                 | Abcam<br>#137132                                         |
| <b>CD69</b>     | Rabbit         | Human CD69                                                                                                      | 1:750                                             | Opal <sup>3</sup>                                                                          | AR9                 | Invitrogen<br>#PA5-84010                                 |
| <b>Iba1</b>     | Rabbit         | Microglia and Macrophage                                                                                        | 1:10000                                           | Opal <sup>3</sup><br>Cy2- $\alpha$ -rabbit <sup>5</sup>                                    | AR9                 | Wako<br>#019-19741                                       |
| <b>pStat-1</b>  | Rabbit         | endogenous levels of Stat1 only when phosphorylated at tyrosine 701 of p91 Stat and also the p84 splice variant | 1:1000                                            | Streptavidin-Cy3 <sup>6</sup>                                                              | EDTA pH9            | Cell Signaling<br>#9167                                  |
| <b>C9neo</b>    | Rabbit         | Recognises the activated C5b-C9 end complex                                                                     | 1:2000                                            | bi- $\alpha$ -rabbit <sup>1</sup>                                                          | Protease            | Gift of Paul Morgan, Dept. of Biochemistry, Cardiff, UK. |
| <b>C3d</b>      | Rabbit         | Human C3d                                                                                                       | 1:250                                             | bi- $\alpha$ -rabbit <sup>1</sup>                                                          | Citrate             | Agilent #A0063                                           |
| <b>Ki-67</b>    | Mouse          | human recombinant peptide corresponding to a 1002 bp Ki-67 cDNA Fragment                                        | 1:4000                                            | Opal <sup>3</sup>                                                                          | AR9                 | Dako<br>#M7240                                           |
| <b>PCNA</b>     | Mouse          | Rat PCNA protein A fusion protein obtained from vector PC2T                                                     | 1:100000                                          | Opal <sup>3</sup>                                                                          | AR9                 | Dako<br>#M0879                                           |

|             |        |                            |       |                   |     |                      |
|-------------|--------|----------------------------|-------|-------------------|-----|----------------------|
| <b>IgG1</b> | Rabbit | Hinge region of Human IgG1 | 1:500 | Opal <sup>3</sup> | AR9 | Invitrogen #RM117    |
| <b>IgG2</b> | Mouse  | Human IgG2                 | 1:150 | Opal <sup>3</sup> | AR9 | ThermoFisher #HP6002 |
| <b>IgG3</b> | Rabbit | Human IgG3                 | 1:200 | Opal <sup>3</sup> | AR9 | Invitrogen #RM119    |
| <b>IgG4</b> | Rabbit | Hinge region of Human IgG4 | 1:500 | Opal <sup>3</sup> | AR9 | Abcam #EP4420        |

<sup>1</sup> 1:2000 Jackson immuno Research #711-165-152  
<sup>2</sup> 1:1000 Jackson immuno Research #705-065-150  
<sup>3</sup> Opal 7-Color Manual IHC Kit (Akoya); Different combinations of fluorophores were used (Opal 480, Opal520, Opal570, Opal620, Opal690, Opal780)  
<sup>4</sup> 1:100 Jackson immune Research #715-175-151  
<sup>5</sup> 1:200 Jackson immune Research #711-165-144  
<sup>6</sup> 1:100 Jackson immune Research

**Supplementary Table 1: Antibodies used for immunohistochemistry and multiple immune fluorescence**

## Supplementary Table 2

| Pat-ID | Start of immuno-tx (yrs after disease onset) | End of immuno-tx (yrs after disease onset) | Pre/post surgery | Immunotherapy                                                                                                                                                              | Change of ASM during immuno-tx | Sz outcome |
|--------|----------------------------------------------|--------------------------------------------|------------------|----------------------------------------------------------------------------------------------------------------------------------------------------------------------------|--------------------------------|------------|
| 2      | 0.8                                          | 1.7                                        | post             | Oral prednisolone 80 mg/d, within 3 wks tapered to 5 mg/d                                                                                                                  | =                              | 2          |
| 2      | 2.4                                          | 16.6                                       | post             | One IVMP pulse, then oral prednisolone, 60 mg/d, tapered to 5 mg/d (continued, ongoing). 8-10 yrs after onset: monthly IVIG; 10.5 yrs after onset: PEX, RTX; 11.3 yrs: PEX | +                              | 2          |
| 3      | 0.4                                          | 0.7                                        | pre              | IVMP pulses                                                                                                                                                                | +                              | 4          |
| 3      | 0.8                                          | 3.8                                        | pre/post         | Immunoadsorption, CSF drainage, cyclophosphamide, MMF                                                                                                                      | =                              | 4          |
| 4      | 8.0                                          | 8.6                                        | post             | IVIG                                                                                                                                                                       | ?                              | 3          |
| 4      | 9.9                                          | 10.8                                       | post             | PEX, IVIG                                                                                                                                                                  | ?                              | 4          |
| 6      | 0.4                                          | 1.4                                        | pre              | IVMP pulses, later IVIG                                                                                                                                                    | +                              | 4          |
| 6      | 9.3                                          | 9.6                                        | post             | IV natalizumab, three infusions à 300 mg                                                                                                                                   | =                              | 4          |
| 6      | 11.0                                         | 11.4                                       | post             | Monthly IV cyclophosphamide, five infusions à 700 or 750 mg                                                                                                                | =                              | 4          |
| 7      | 3.5                                          | 5.4                                        | pre              | Three IVMP pulses                                                                                                                                                          | =                              | 3          |
| 8      | 3.1                                          | 4.3                                        | pre              | IVMP pulses                                                                                                                                                                | =                              | 2          |
| 8      | 8.6                                          | 8.9                                        | pre              | IVMP pulses                                                                                                                                                                | =                              | 2          |

### Supplementary Table 2: Seizure response to twelve immunotherapies in six patients with seizures.

Seizure outcomes: 1, reduction by 100%; 2, 75-99%; 3, 50-74%; 4, <50%. ASM, antiseizure medication (+: increase in defined daily doses during immunotherapy intervention; = stable doses; ? information on ASM doses missing); d, day; IV, intravenous; IVIG, intravenous immunoglobulins. Start with 3-5 infusions of 0.4 g/kg body weight, then monthly 0.4 g/kg; MMF, mycophenolate mofetil; MP=intravenous methylprednisolone, 3-5 infusions of 1 g; PEX, plasma exchange; yrs, years.

## Supplementary Table 3

|                          | ≤1 year | >1 year |
|--------------------------|---------|---------|
| Intrathecal synthesis    | 5       | 3       |
| No intrathecal synthesis | 1       | 3       |

### Supplementary Table 3: Intrathecal immunoglobulin G synthesis in patients within 1 year or >1 year after disease onset.

The earliest available CSF study was used per patient. P=0.54, Fisher exact test, two-tailed.

## Supplementary Table 4

| Patient NR | location | HS classification in hippocampal subfields |      |      |      |      | HS average value | ILEA type        |
|------------|----------|--------------------------------------------|------|------|------|------|------------------|------------------|
|            |          | CA1                                        | CA2  | CA3  | CA4  | DG   |                  |                  |
| 1          | Amygdala | n.a.                                       | n.a. | n.a. | n.a. | n.a. | n.a.             | n.a.             |
| 2          | HC       | 2                                          | 2    | 1    | 1    | 0    | 1.2              | atypical HS      |
| 3          | HC       | 2                                          | n.e  | n.e  | 2    | 1    | 1.7              | HS type 1        |
| 4          | Amygdala | n.a.                                       | n.a. | n.a. | n.a. | n.a. | n.a.             | n.a.             |
| 5          | HC       | n.e                                        | n.e  | n.e  | n.e  | n.e  | n.e              | HS not evaluable |
| 6          | HC       | 1                                          | 2    | 2    | 2    | 0    | 1.4              | HS type 3        |
| 7          | HC       | 2                                          | 1    | n.e  | 2    | 0    | 0.8              | HS type 1        |
| 8          | HC       | n.e                                        | n.e  | n.e  | n.e  | n.e  | n.e              | HS not evaluable |
| 9          | HC       | 1                                          | 1    | 2    | 2    | 0    | 1.2              | HS type 3        |
| 10         | HC       | 0                                          | 0    | 0    | 0    | 0    | 0                | no HS            |
| 11         | HC       | n.e                                        | n.e  | n.e  | 2    | 1    | n.e              | HS not evaluable |
| 12         | HC       | 1                                          | 1    | 2    | 1    | 0    | 1                | HS type 3        |
| 13         | HC       | 2                                          | 1    | 1    | 2    | 0    | 1.2              | HS type 1        |
| 14         | HC       | 0                                          | 0    | 0    | 0    | 0    | 0                | no HS            |
| 15         | HC       | 2                                          | n.e  | n.e  | 1    | 1    | 1.3              | HS type 1        |

HS= hippocampal sclerosis; n.a.=not applicable; n.e.= not evaluable

**Supplementary Table 4: Hippocampal sclerosis in GAD-TLE.**

## Supplementary Table 5

| Publication in order of appearance | No. of patients with epilepsy and high-titre GAD antibodies treated with immunotherapy | No. of sz-free patients | Age at epilepsy onset (years) and sex of sz-free patients | Therapy associated with sz-freedom                          | Duration from epilepsy onset to start of treatment in sz-free patients (months) | Duration of terminal sz-freedom (months) |
|------------------------------------|----------------------------------------------------------------------------------------|-------------------------|-----------------------------------------------------------|-------------------------------------------------------------|---------------------------------------------------------------------------------|------------------------------------------|
| 1                                  | 2                                                                                      | 0                       | -                                                         | -                                                           | -                                                                               | -                                        |
| 2                                  | 1                                                                                      | 1                       | 48, F                                                     | Two pulses of IVMP and long-term PEX with oral prednisolone | 24                                                                              | 12                                       |
| 3                                  | 3                                                                                      | 0                       | -                                                         | -                                                           | -                                                                               | -                                        |
| 4                                  | 6                                                                                      | 1                       | 54, F                                                     | IVIg infusions                                              | A few weeks                                                                     | 36                                       |
| 5                                  | 1                                                                                      | 1                       | 42, F                                                     | One pulse of IVMP                                           | 1                                                                               | 12                                       |
| 6                                  | 33                                                                                     | 7                       | No data                                                   | No data                                                     | No data                                                                         | ≥ 12                                     |
| 7                                  | 7                                                                                      | 0                       | -                                                         | -                                                           | -                                                                               | -                                        |
| 8                                  | 13                                                                                     | 1                       | 15, F                                                     | IVMP pulses                                                 | 1.5                                                                             | 30                                       |
| 9                                  | 5                                                                                      | 0                       | -                                                         | -                                                           | -                                                                               | -                                        |
| <b>Sum</b>                         | <b>71</b>                                                                              | <b>11 (15%)</b>         |                                                           |                                                             |                                                                                 |                                          |

### Supplementary table 5: Series in the literature reporting on patients with epilepsy and high-titre GAD antibodies treated with immunotherapy.

F=female; IVIG, intravenous immunoglobulins; IVMP, intravenous methylprednisolone (one pulse: 5 times 1 g on consecutive days); PEX=plasma exchange (1.2 plasma volumes per session); sz=seizure

#### References:

1. Matà S, Muscas GC, Cincotta M, Bartolozzi ML, Ambrosini S, Sorbi S. GAD antibodies associated neurological disorders: incidence and phenotype distribution among neurological inflammatory diseases. *J Neuroimmunol.* 2010; 227: 175-177.
2. Markakis I, Alexopoulos H, Pouloupoulou C, et al. Immunotherapy-responsive limbic encephalitis with antibodies to glutamic acid decarboxylase. *J Neurol Sci.* 2014; 343: 192-194.
3. Elisak M, Krysl D, Hanzalova J, et al. The prevalence of neural antibodies in temporal lobe epilepsy and the clinical characteristics of seropositive patients. *Seizure.* 2018; 63: 1-6.
4. Mäkelä KM, Hietaharju A, Brander A, Peltola J. Clinical management of epilepsy with glutamic acid decarboxylase antibody positivity: the interplay between immunotherapy and anti-epileptic drugs. *Front Neurol.* 2018; 9: 579.
5. Di Giacomo R, Deleo F, Pastori C, et al. Predictive value of high titer of GAD65 antibodies in a case of limbic encephalitis. *J Neuroimmunol.* 2019; 337: 577063.
6. Joubert B, Belbezier A, Haesebaert J, et al. Long-term outcomes in temporal lobe epilepsy with glutamate decarboxylase antibodies. *J Neurol.* 2020; 267: 2083-2089.
7. Muñoz-Lopetegi A, de Bruijn MA, Boukhrissi S, et al. Neurologic syndromes related to anti-GAD65: Clinical and serologic response to treatment. *Neurol Neuroimmunol Neuroinflamm.* 2020; 7: e696.
8. Rada A, Birnbacher R, Gobbi C, et al. Seizures associated with antibodies against cell surface antigens are acute symptomatic and not indicative of epilepsy: insights from long-term data. *J Neurol.* 2021; 268: 1059-1069.

9. de Bruijn MAAM, Bastiaansen AEM, Mojzisova H, et al. Antibodies contributing to focal epilepsy signs and symptoms score. *Ann Neurol*. 2021; 89: 698-710.
